# Supplementary material for: Compartmental Analysis of T-cell Clonal Dynamics as a Function of Pathologic Response to Neoadjuvant PD-1 Blockade in Resectable Non–Small Cell Lung Cancer
Source: Oxford University Press journal article supplement (doi:10.1158/1078-0432.ccr-19-2931), 2019-11-21
Supplement: 10780432ccr192931-sup-228602_2_supp_5890135_q0xjc0.xlsx [file 10780432ccr192931-sup-228602_2_supp_5890135_q0xjc0.xlsx]

## Sheet: patinfo.wide
Table 2. Correlative assays performed on each sample.
Patient numbera	Study IDa	Genomics identifiera	Peripheral blood before surgery			Peripheral blood after surgery					Tisssue
			Pre-treatment	W2	W4	M0-3	M3-6	M6-9	M9-12	Y1+	Pre-treatment Tumor	Post-treatment Tumor	Normal lung	Lymph node
1	MD01-024	CGLU264	TCR seq, flow sorting+TCR seq	TCR seq	TCR seq	TCR seq	TCR seq	TCR seq	TCR seq	-	Whole exome sequencing#	TCR seq	TCR seq	-
2	MD043-023	CGLU265	TCR seq	-	TCR seq	-	-	-	-	-	-	-	-	-
3	MD01-010	CGLU223	TCR seqb	TCR seq	TCR seq	-	-	-	-	-	-	TCR seqb	TCR seq	-
4	MD01-004	CGLU205	TCR seqb	TCR seq	TCR seq	TCR seq	-	-	-	-	Whole exome sequencingb	TCR seqb	TCR seq	-
5	MD043-011	CGLU222	TCR seqb	TCR seq	TCR seq	TCR seq	-	-	-	-	Whole exome sequencingb	TCR seqb	TCR seq	-
6	MD01-019	CGLU224	TCR seq	TCR seq	TCR seq	TCR seq	TCR seq	TCR seq	-	-	TCR seq, whole exome sequencingb	TCR seqb,c	TCR seq	-
7	NY016-007	CGLU218	TCR seqb	TCR seq	TCR seq	TCR seq	-	-	-	-	Whole exome sequencingb	TCR seqb	TCR seq	-
8	NY016-009	CGLU219	TCR seqb	TCR seq	TCR seq	TCR seq	-	-	-	-	-	TCR seqb	TCR seq	-
9	NY016-014	CGLU220	TCR seqb	TCR seq	TCR seq	TCR seq	-	-	-	-	Whole exome sequencingb	TCR seqb	TCR seq	-
10	NY016-015	CGLU225	TCR seqb	TCR seq	TCR seq	TCR seq	-	-	-	-	-	TCR seqb	TCR seq	-
11	NY016-016	CGLU259	TCR seq	-	TCR seq	-	-	-	-	-	Whole exome sequencingb	TCR seq	TCR seq	-
12	NY016-020	CGLU249	TCR seq	TCR seq	TCR seq	TCR seq	-	-	-	-	-	-	TCR seq	-
13	NY016-021	CGLU279	TCR seq	TCR seq	TCR seq	TCR seq	-	-	-	-	-	TCR seq	TCR seq	-
14	NY016-022	CGLU250	TCR seq	TCR seq	TCR seq	TCR seq	-	-	-	-	-	-	TCR seq	-
15	NY016-025	CGLU256	TCR seq	TCR seq	TCR seq	TCR seq	-	-	-	-	-	-	TCR seq	-
16	MD043-008	CGLU215	TCR seqb	TCR seq	-	-	-	-	-	-	Whole exome sequencingb	TCR seqb	TCR seq	-
17	MD043-003	CGLU206	TCR seq	TCR seq	TCR seq	TCR seq	TCR seq	-	-	TCR seq	-	TCR seqb	TCR seq	-
18	MD01-005	CGLU204	TCR seqb, flow sorting+TCR seq	TCR seqb	TCR seqb	TCR seqb	-	-	-	TCR seq	TCR seqb, whole exome sequencingb	TCR seqb	TCR seqb	TCR seqb
19	MD043-006	CGLU221	TCR seqb	TCR seq	-	TCR seq	-	-	-	-	Whole exome sequencingb	TCR seqb	TCR seq	-
a. As reported in Forde PM et al, Neoadjuvant PD-1 blockade in resectable lung cancer. N Engl J Med, 2018
b. Sequencing files previously used for analyses in Forde PM et al, Neoadjuvant PD-1 blockade in resectable lung cancer. N Engl J Med, 2018
c. Bulk TCR seq for MD01-019 was excluded from clonal space and clonal sharingness analysis due to library size <1000
