# Supplementary material for: Compartmental Analysis of T-cell Clonal Dynamics as a Function of Pathologic Response to Neoadjuvant PD-1 Blockade in Resectable Non–Small Cell Lung Cancer
Source: Oxford University Press journal article supplement (doi:10.1158/1078-0432.ccr-19-2931), 2019-11-21
Supplement: 10780432ccr192931-sup-228602_2_supp_5890136_q06jc0.xlsx [file 10780432ccr192931-sup-228602_2_supp_5890136_q06jc0.xlsx]

## Sheet: clinical_pt
Table S1. Clinical and genomic data for patients included in the correlative study
Study ID	Residual Tumor (%)	MPR status	Number of sequence alterations for pre-treatment tumora
NY016-007	60	0	5
MD01-024	100	0	23
NY016-014	95	0	26
MD043-011	75	0	75
MD01-004	40	0	99
MD01-019	95	0	105
MD043-006	50	0	190
MD01-005	0	1	256
MD043-008	10	1	310
NY016-016	0	1	366
NY016-025	0	1	NA
NY016-021	100	0	NA
NY016-015	80	0	NA
NY016-009	30	0	NA
MD01-010	5	1	NA
MD043-003	5	1	NA
MD043-023	5	1	NA
NY016-020	5	1	NA
NY016-022	5	1	NA
MPR: major pathologic response
a. Data reported in Forde PM et al, Neoadjuvant PD-1 blockade in resectable lung cancer. N Engl J Med, 2018
